# Supplementary material for: Association between Early Absolute Neutrophil Count and Level of D-Dimer among Patients with COVID-19 Infection in Central Taiwan
Source: MDPI journal article supplement (doi:10.3390/jcm10173891), 2021-08-30
Supplement: s1 [file s1]

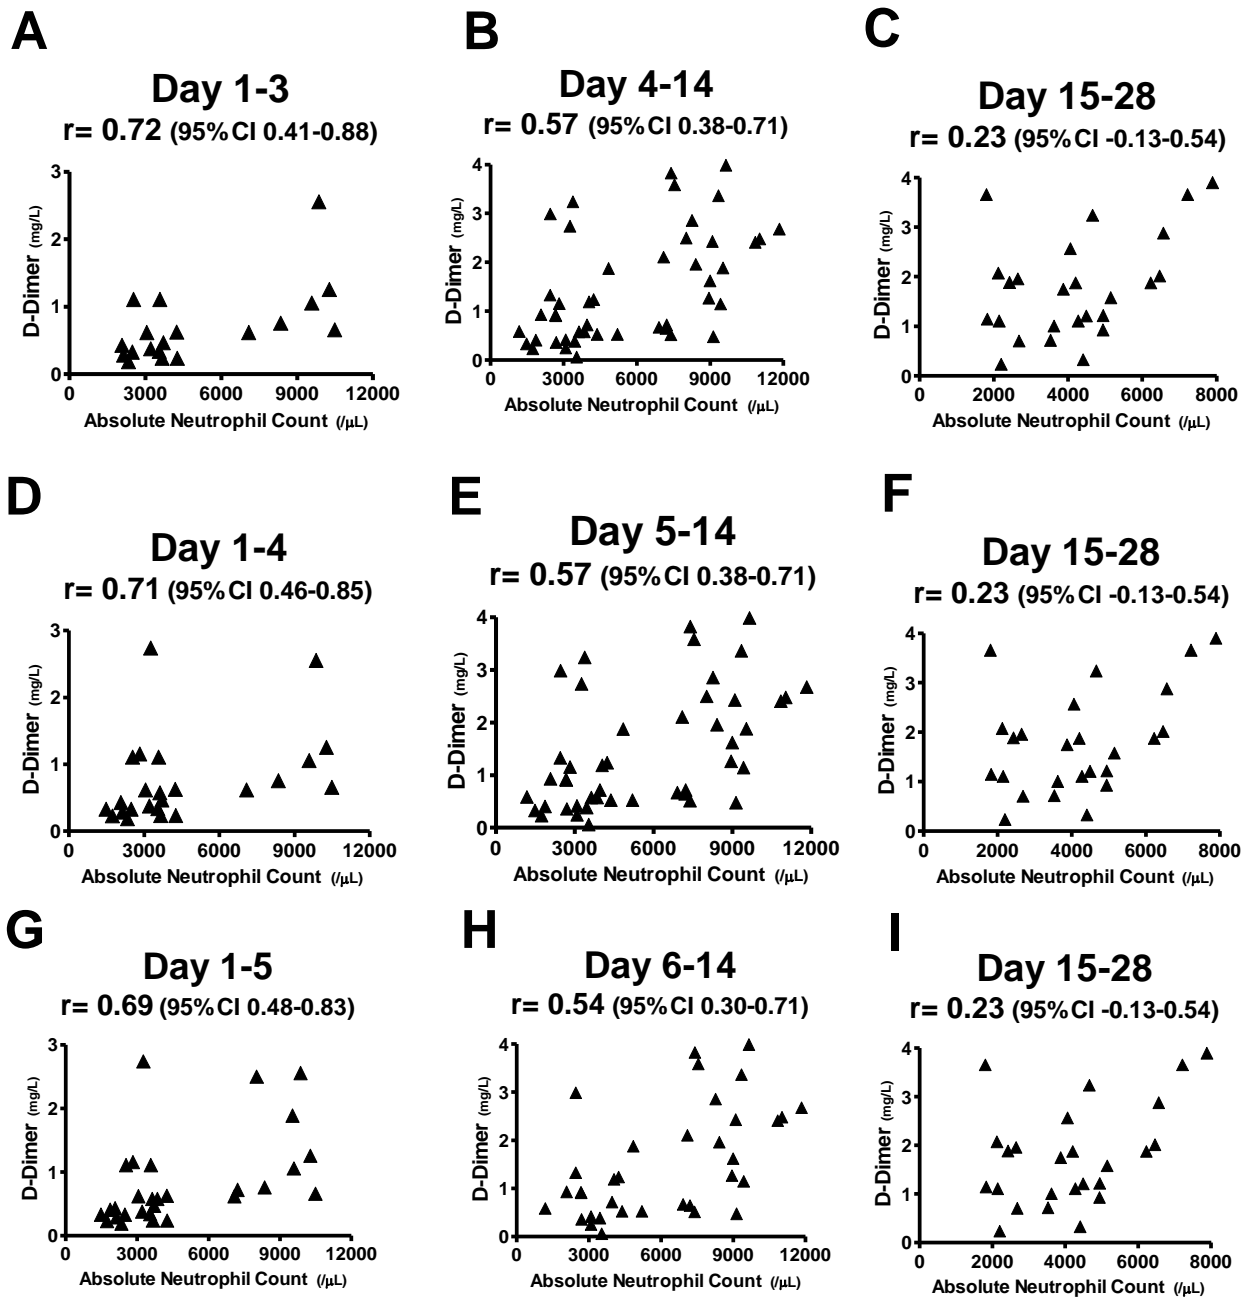

**Supplemental Figure S1. Correlation between the level of D-Dimer and neutrophil count among patients with COVID categorised by distinct time periods**
